# Supplementary material for: Characterizing Safety and Clinical Outcomes Associated with High-Dose Micafungin Utilization in Patients with Proven Invasive Candidiasis
Source: MDPI journal article supplement (doi:10.3390/tropicalmed7020023), 2022-02-03
Supplement: s1 [file s1]

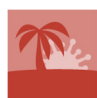

Brief Report

# Characterizing Safety and Clinical Outcomes Associated with High-Dose Micafungin Utilization in Patients with Proven Invasive Candidiasis

Victoria C. Grant, Kenneth Nguyen, Sasha Rodriguez, Anna Y. Zhou, Jacinda C. Abdul-Mutakabbir and Karen K. Tan

**Table S1.** Select Baseline Demographics, Clinical Characteristics, Microbiology and Treatment Data Among Patients That Died and Patients That Survived.

| Characteristic                                                    | Died (n = 4)     | Survived (n = 19) |
|-------------------------------------------------------------------|------------------|-------------------|
| Age (y), median (IQR)                                             | 35.5 (31.7–39.2) | 61 (34–67)        |
| Male gender, n (%)                                                | 4 (100)          | 13 (68.4%)        |
| Race, n (%)                                                       |                  |                   |
| Hispanic/Latino                                                   | 3 (75)           | 9 (47.4)          |
| White (non-Hispanic/Latino)                                       | 1 (25)           | 7 (36.8)          |
| Black (non-Hispanic/Latino)                                       | 0                | 3 (15.8)          |
| Obese/morbidly obese, n (%)                                       | 3 (75)           | 13 (68.4)         |
| Sepsis criteria, n (%)                                            |                  |                   |
| Sepsis                                                            | 1 (25)           | 5 (26.3)          |
| Septic Shock                                                      | 2 (50)           | 2 (10.5)          |
| Not septic                                                        | 0                | 8 (42.1)          |
| Unable to calculate due to missing data                           | 1 (25)           | 4 (21.1)          |
| ICU admission at time of micafungin initiation                    | 4 (100)          | 10 (52.6)         |
| APACHE II score, median (IQR)*                                    | 28 (13–31)       | 24 (18–31)        |
| Candidemia, n (%)                                                 | 4 (100)          | 6 (31.6)          |
| Common sources, n (%)                                             |                  |                   |
| Central line                                                      | 2 (50)           | 5 (26.3)          |
| Intra-abdominal                                                   | 1 (25)           | 8 (42.1)          |
| Bone/joint                                                        | 1 (25)           | 4 (21.1)          |
| Received HD micafungin for entirety of echinocandin course, n (%) | 3 (75)           | 12 (63.2)         |

APACHE: acute physiology and chronic health evaluation; HD: high dose; ICU: intensive care unit; IQR: interquartile range; y: years. \* APACHE II scores were calculated using data from 3 and 7 patients that died and survived, respectively; the remaining patients admitted to the ICU could not have APACHE II scores calculated due to missing data.
